# Supplementary material for: Integrated profiling of endoplasmic reticulum stress-related DERL3 in the prognostic and immune features of lung adenocarcinoma
Source: PubMed Central journal article supplement (PMC9585215; doi:10.3389/fimmu.2022.906420), 2022-10-07
Supplement: DataSheet_1.pdf [file DataSheet_1.pdf]

### Supplementary Material

**Figure S1.** Essential biomarkers of ER stress altered with DERL3 expression (\* $P < 0.05$ , \*\*\* $P < 0.001$ , \*\*\*\* $P < 0.0001$ ).

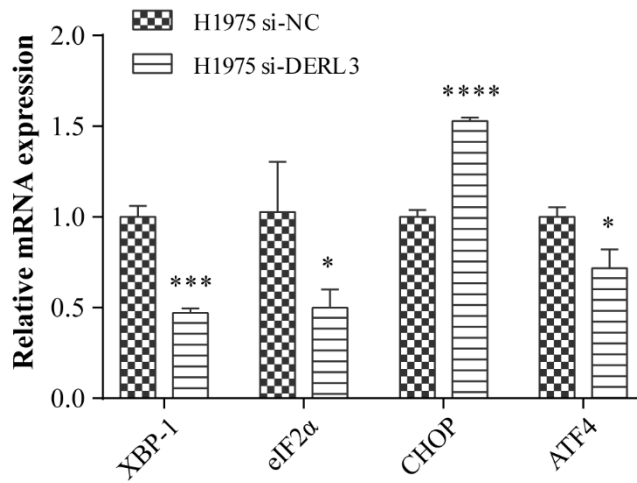

**Figure S2.** IC<sub>50</sub> values of docetaxel, cisplatin and paclitaxel on LUAD tissues (\* $P < 0.05$ , \*\* $P < 0.01$ ).

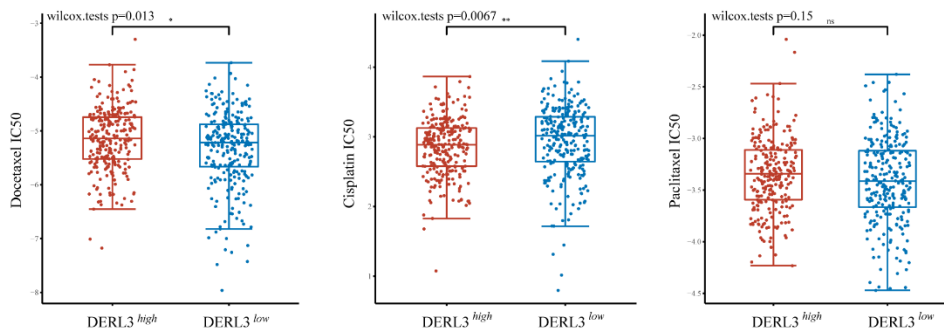

**Figure S3.** TIDE computational framework of responders and non-responders.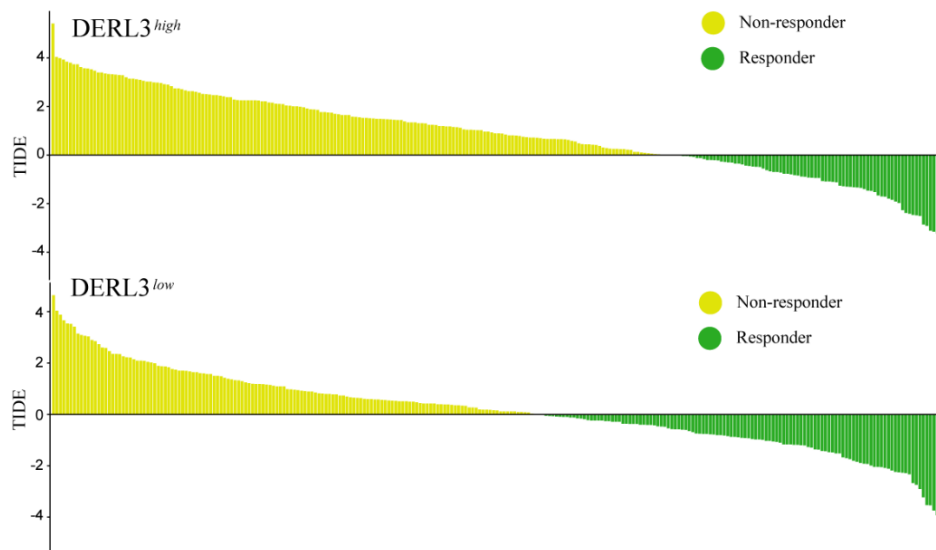**Figure S4.** Heat maps of Derlin protein profiles identified in LUAD and adjacent non-cancerous tissues.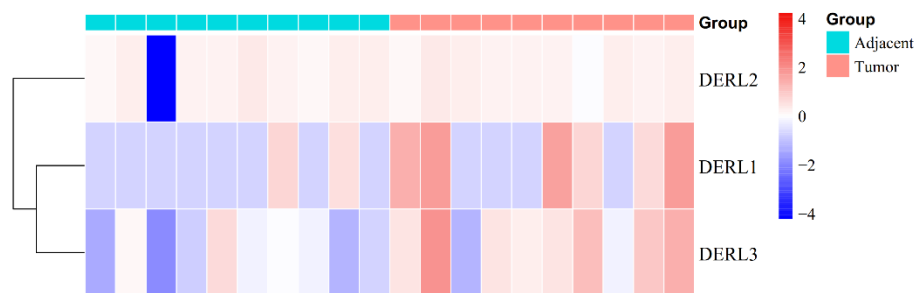**Figure S5.** Overexpression of DERL3 enhanced SPCA-1 migration and proliferation. (a) Overexpression efficiency was identified in SPCA-1 cells after DERL3-flag plasmid transfection. (b) CCK-8 assay was performed to evaluate the proliferation of SPCA-1 cells after DERL3 overexpression. (c) Scratch assays of SPCA-1 cells after transfection with DERL3-flag plasmid. (d) Transwell migration assays were performed in SPCA-1 cells. (e-f) Statistical analysis of scratch assay and transwell migration assay. (\* $P < 0.05$ , \*\* $P < 0.01$ , \*\*\*\* $P < 0.0001$ ).

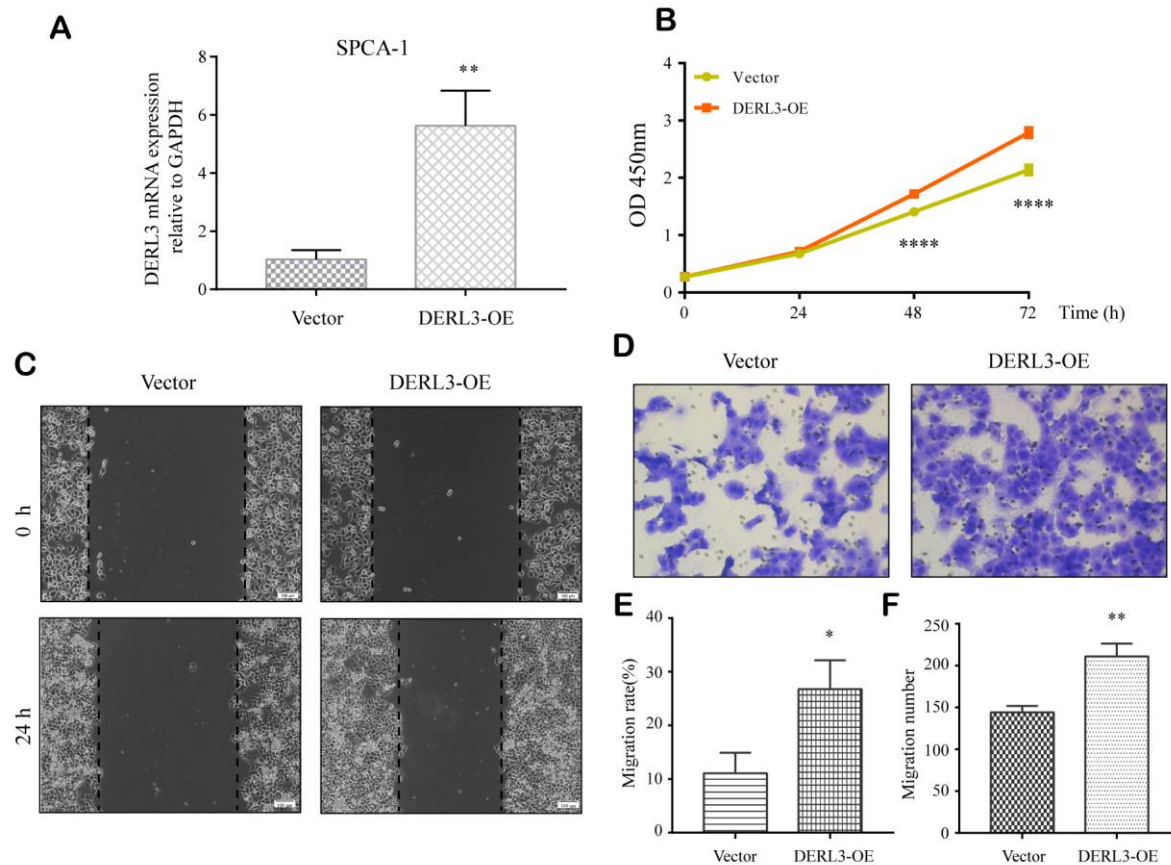

**Table S1.** Sequence information

| Gene          | Forward (5'-3')         | Reverse (5'-3')          |
|---------------|-------------------------|--------------------------|
| Si-DERL3-1    | CCCCUUCAACUCUACUUAATT   | UUGAAGUAGAGUUGAAAGGGT    |
| Si-DERL3-2    | GAUUCAGCUUCUUCUUAATT    | UUGAAGAAGAAGCUGAAUCTT    |
| Si-DERL3-3    | CUAGAUCUUCAGUGCUGUAUGTT | CAUACAGCACUGAAGAUCUAGTT  |
| Si-NC         | UUCUCCGAACGUGUCACGUTT   | ACGUGACACGUUCGGAGAATT    |
| DERL3         | TCTGGAAGGAGAACAGGCTGAGG | AGGTGGTATGTGAACAAGGTTGGC |
| XBP-1         | CCTGGTTGCTGAAGAGGAGG    | CCATGGGGAGATGTTCTGGAG    |
| eIF2 $\alpha$ | GCTGTGACACCGTAACTCTT    | CCACAGGTTTCTCAGGTAAG     |
| CHOP          | AGGCGACCAAATAAAGAAGG    | TGCTGAGTTGAGCGTTATACTG   |

ATF4      ATGACCGAAATGAGCTTCCTG      GCTGGAGAACCCATGAGGT  
 GAPDH      CATGTTTCGTCATGGGTGTGAACCA      AGTGATGGCATGGACTGTGGTCAT

---

**Table S2.** Correlations between DERL3 and gene markers of infiltrating immune cells.

| Cell             | Gene marker | Without adjustment |                | Purity adjustment |                |
|------------------|-------------|--------------------|----------------|-------------------|----------------|
|                  |             | Spearman's $\rho$  | $P$            | Spearman's $\rho$ | $P$            |
| B cell           | CD19        | 0.679              | 5.49E-71 ****  | 0.623             | 2.00E-54 ****  |
|                  | MS4A1       | 0.464              | 6.60E-29 ****  | 0.365             | 5.13E-17 ****  |
|                  | CD22        | 0.364              | 1.51E-17 ****  | 0.248             | 2.3E-08 ****   |
|                  | CD23        | 0.362              | 2.15E-17 ****  | 0.268             | 1.49E-09 ****  |
|                  | CD79A       | 0.816              | 1.94E-124 **** | 0.791             | 7.88E-107 **** |
|                  | CD79B       | 0.686              | 7.43E-73 ****  | 0.636             | 3.49E-57 ****  |
| CD8+ T cell      | CD8A        | 0.339              | 2.35E-15 ****  | 0.216             | 1.35E-06 ****  |
|                  | CD8B        | 0.335              | 5.95E-15 ****  | 0.241             | 6.19E-08 ****  |
| Th1              | IL-2        | 0.208              | 1.87E-06 ****  | 0.149             | 0.0009 ***     |
| Th2              | IL-4        | 0.008              | 0.859          | 0.014             | 0.763          |
|                  | IL-5        | 0.061              | 0.163          | 0.036             | 0.419          |
| Treg             | FOXP3       | 0.451              | 3.40E-27 ****  | 0.349             | 1.46E-15 ****  |
|                  | CCR8        | 0.377              | 7.67E-19 ****  | 0.281             | 2.04E-10 ****  |
|                  | IL-7R       | 0.356              | 7.86E-17 ****  | 0.238             | 9.38E-08 ****  |
| T cell exhausted | LAG3        | 0.384              | 1.68E-19 ****  | 0.281             | 2.05E-10 ****  |
|                  | CTLA4       | 0.421              | 1.72E-23 ****  | 0.308             | 2.86E-12 ****  |

|            |        |        |               |        |               |
|------------|--------|--------|---------------|--------|---------------|
| DC         | CD1C   | 0.075  | 0.089         | -0.004 | 0.927         |
| Macrophage | CD68   | 0.165  | 0.0002 ***    | 0.051  | 0.258         |
| M1         | NOS2   | 0.128  | 0.004 **      | 0.052  | 0.253         |
|            | ROS1   | -0.018 | 0.681         | -0.077 | 0.086         |
|            | IL-12B | 0.144  | 0.001 **      | 0.046  | 0.312         |
|            | HLA-DR | 0.227  | 1.81E-07 **** | 0.116  | 0.010 **      |
| M2         | ARG1   | 0.055  | 0.213         | 0.0498 | 0.270         |
|            | MRC1   | 0.066  | 0.135         | -0.031 | 0.490         |
|            | CD68   | 0.165  | 0.0002 ***    | 0.051  | 0.258         |
|            | CD163  | 0.163  | 0.0002 ***    | 0.046  | 0.310         |
| TAM        | HLA-G  | 0.147  | 0.0008 ***    | 0.068  | 0.130         |
|            | CD80   | 0.215  | 7.97E-07 **** | 0.083  | 0.067         |
|            | CD86   | 0.248  | 1.25E-08 **** | 0.115  | 0.010 *       |
| MDSC       | CD33   | 0.134  | 0.002 **      | 0.011  | 0.804         |
| M-MDSC     | CD14   | 0.292  | 1.51E-11 **** | 0.183  | 4.20E-05 **** |

---

Treg, Regulatory T cells; DC, Dendritic cells; TAM, Tumor associated macrophage; MDSC, Myeloid-derived suppressor cell; M-MDSC, Monocytic myeloid-derived suppressor cell; \* $P < 0.05$ ; \*\* $P < 0.01$ ; \*\*\* $P < 0.001$ ; \*\*\*\* $P < 0.0001$ .
